# Supplementary material
Source: PubMed Central journal article supplement (PMC6731506)

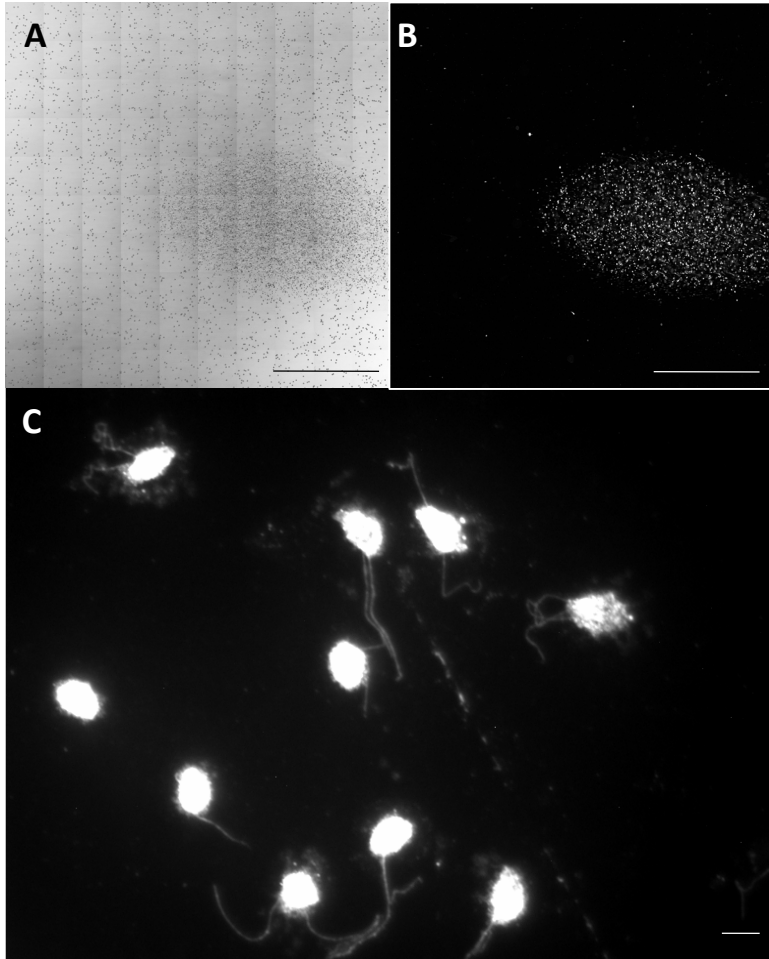

**Figure S1**

Supplement: rsif20190367supp1.pdf [file rsif20190367supp1.pdf]

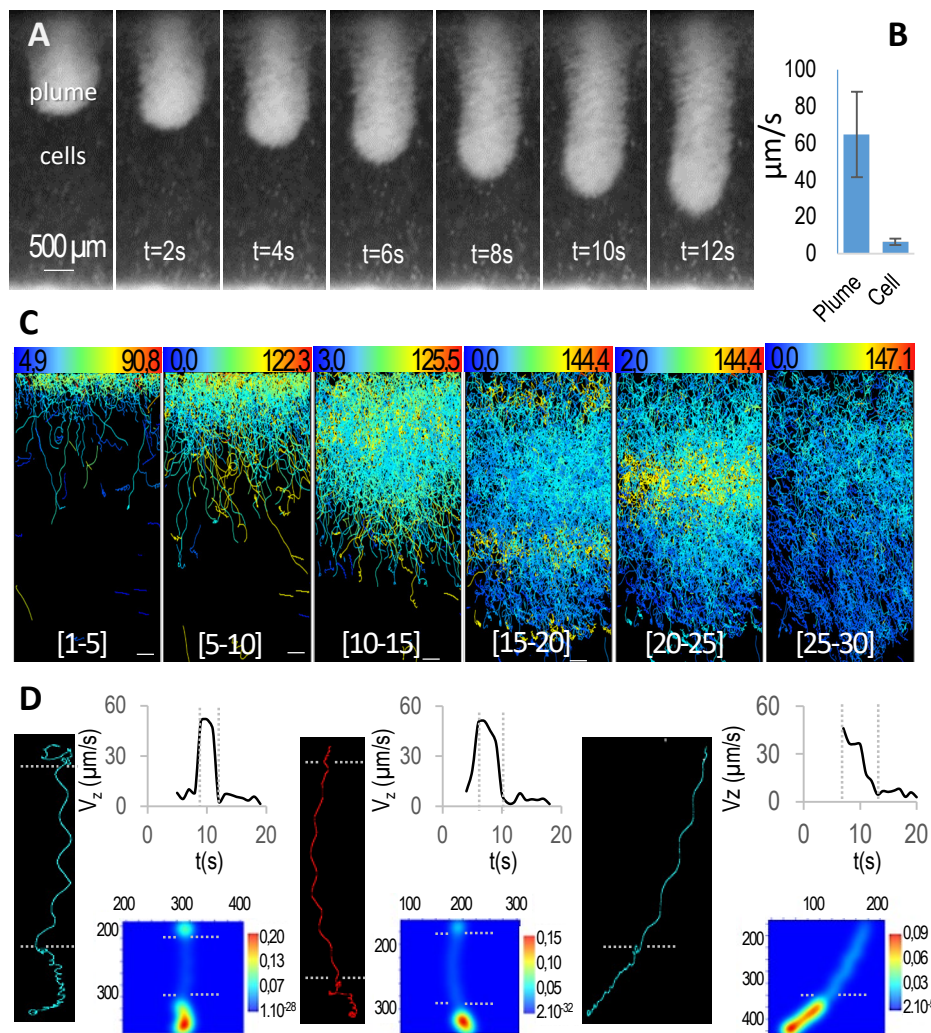

Figure S2

Supplement: rsif20190367supp2.pdf [file rsif20190367supp2.pdf]
